# Supplementary material for: Investigating the Effect of Consumers’ Knowledge on their Acceptance of Functional Foods: A Systematic Review and Meta-Analysis
Source: Preprints.org preprint supplement (doi:10.20944/preprints202203.0326.v1), 2022-03-24
Supplement: Supplementary file 1 [file supplementary]

Supplementary Material 1

TableS1 Databases and search terms used to search articles

| **Database (Search date)** | **Search terms** | **No. of articles** |
| --- | --- | --- |
| CAB Abstracts (Ovid) (July 6, 2021) | ((functional food* or functional product* or enriched food* or enriched product* or fortified food* or fortified product* or enhanced food* or enhanced product*).mp AND (accept* or behavior* or attitude* or perception* or pay or buy or purchase* or preference* or choice* or response*or reaction* or aware* or believe* or belief).mp AND (knowledge).mp. | 154 |
| FSTA (15 July 2021) | **Subject Heading search**: 88  (DE "FUNCTIONAL FOODS" OR DE "FUNCTIONAL BEVERAGES" OR DE "FORTIFIED BEVERAGES" OR DE "FORTIFIED FOODS") AND (DE "CONSUMER ACCEPTABILITY" OR DE "CONSUMER ACCEPTANCE" OR DE "CONSUMER ATTITUDES" OR DE "CONSUMER AWARENESS" OR DE "CONSUMER BEHAVIOUR" OR DE "PURCHASING BEHAVIOUR" OR DE "CONSUMER CHOICE" OR DE "CONSUMER EXPECTATIONS" OR DE "CONSUMER LIKING" OR DE "CONSUMER OPINIONS" OR DE "CONSUMER PERCEPTION" OR DE "CONSUMER PREFERENCE") AND ((DE "NUTRITIONAL LABELLING") OR knowledge)  **Title/Abstract Search:** 118  ((TI ("FUNCTIONAL FOOD*" OR "FUNCTIONAL BEVERAGE*" OR “FUNCTIONAL PRODUCT*” OR "FORTIFIED FOOD*" OR "FORTIFIED BEVERAGE*" OR “FORTIFIED PRODUCT*” OR “ENRICHED FOOD*” OR “ENRICHED PRODUCT*” OR “ENHANCED FOOD*” OR “ENHANCED PRODUCT*”)) OR (AB ("FUNCTIONAL FOOD*" OR "FUNCTIONAL BEVERAGE*" OR “FUNCTIONAL PRODUCT*” OR "FORTIFIED FOOD*" OR "FORTIFIED BEVERAGE*" OR “FORTIFIED PRODUCT*” OR “ENRICHED FOOD*” OR “ENRICHED PRODUCT*” OR “ENHANCED FOOD*” OR “ENHANCED PRODUCT*”))) AND ((TI (ACCEPT* OR BEHAVIOR* OR BEHAVIOUR OR ATTITUDE* OR PERCEPTION* OR PAY OR BUY OR PURCHASE* OR PREFERENCE* OR CHOICE* OR RESPONSE*OR REACTION* OR AWARE* OR BELIEVE* OR BELIEF)) OR (AB (ACCEPT* OR BEHAVIOR* OR BEHAVIOUR OR ATTITUDE* OR PERCEPTION* OR PAY OR BUY OR PURCHASE* OR PREFERENCE* OR CHOICE* OR RESPONSE*OR REACTION* OR AWARE* OR BELIEVE* OR BELIEF))) AND ((TI ("NUTRITION* LABEL*" OR KNOWLEDGE)) OR (AB ("NUTRITION* LABEL*" OR KNOWLEDGE))) | 206 |
| Web of Science (core collection) (22 July 2021) | ("FUNCTIONAL FOOD*" OR "FUNCTIONAL BEVERAGE*" OR “FUNCTIONAL PRODUCT*” OR "FORTIFIED FOOD*" OR "FORTIFIED BEVERAGE*" OR “FORTIFIED PRODUCT*” OR “ENRICHED FOOD*” OR “ENRICHED PRODUCT*” OR “ENHANCED FOOD*” OR “ENHANCED PRODUCT*”) AND (ACCEPT* OR BEHAVIOR* OR BEHAVIOUR OR ATTITUDE* OR PERCEPTION* OR PAY OR BUY OR PURCHASE* OR PREFERENCE* OR CHOICE* OR RESPONSE*OR REACTION* OR AWARE* OR BELIEVE* OR BELIEF) AND (KNOWLEDGE) | 690 |

Supplementary Material 2

Table S2 Quality criteria of including studies for systematic review

| **Authors** | **Q1** | **Q2** | **Q3** | **Q4** | **Q5*** | **Q6** | **Q7** | **Q8** | **Percentage of ‘Yes’** | **Risk of bias** |
| --- | --- | --- | --- | --- | --- | --- | --- | --- | --- | --- |
| Arenna et al., 2019 | Y | Y | Y | Y | N | Y | Y | Y | 100% | Low |
| Ares et al., 2008 | Y | N | y | Y | N | y | Y | Y | 87.50% | Low |
| Barreiro-Hurlé et al., 2008 | Y | Y | Y | Y | N | Y | Y | Y | 100% | Low |
| Bimbo et al., 2018 | Y | Y | Y | Y | N | Y | Y | Y | 100% | Low |
| Brečić et al., 2014 | Y | Y | Y | Y | N | Y | Y | Y | 100% | Low |
| Chammas et al., 2019 | Y | Y | Y | Y | Y | Y | Y | Y | 87.50% | Low |
| Clark et al., 2019 | U | Y | Y | Y | Y | Y | Y | Y | 75% | Low |
| Corso et al., 2018 | Y | Y | Y | Y | Y | Y | Y | Y | 87.50% | Low |
| Cukelj et al., 2016 | N | U | Y | Y | U | Y | Y | Y | 62.50% | Moderate |
| Dean et al., 2012 | U | Y | Y | Y | U | Y | Y | Y | 87.50% | Low |
| Di Talia et al., 2018 | U | U | Y | Y | U | Y | Y | Y | 62.50% | Moderate |
| Grochowska-Niedworok et al., 2017 | N | N | Y | U | U | Y | Y | Y | 50% | Moderate |
| Hasnah 2011 | N | Y | Y | Y | Y | Y | Y | Y | 87.50% | Low |
| Hayat et al., 2010 | U | N | Y | U | U | Y | Y | Y | 50% | Moderate |
| Henson et al., 2008 | U | Y | Y | Y | U | Y | Y | Y | 75% | low |
| Herath et al., 2008 | Y | Y | Y | Y | N | Y | Y | Y | 100% | Low |
| Hung et al., 2016 | Y | Y | Y | Y | N | Y | Y | Y | 100% | Low |
| Kolodinsky et al., 2008 | N | Y | Y | Y | Y | Y | Y | Y | 75% | Low |
| Labrecque et al., 2006 | N | Y | Y | Y | Y | Y | Y | Y | 75% | Low |
| La Barbera et al., 2016 | N | Y | Y | Y | Y | Y | Y | Y | 87.50% | Low |
| Lu., 2015 | N | Y | Y | Y | Y | Y | Y | Y | 75% | Low |
| Nguyen, 2020 | U | Y | Y | Y | U | Y | Y | Y | 87.50% | Low |
| O'Connor & Venter, 2012 | N | Y | Y | Y | Y | Y | Y | Y | 75% | Low |
| Di Pasquale et al., 2011 | N | Y | Y | Y | Y | Y | Y | Y | 75% | Low |
| Pounis at al., 2011 | N | Y | Y | Y | Y | Y | Y | Y | 75% | Low |
| Sääksjärvi et al., 2009 | U | Y | Y | Y | U | Y | Y | Y | 87.50% | Low |
| Sandmann et al., 2015 | Y | Y | Y | Y | N | Y | Y | Y | 100% | Low |
| Schnettler et al., 2015 | Y | Y | Y | Y | N | Y | Y | Y | 100% | Low |
| Schnettler et al., 2016 | N | Y | Y | Y | Y | Y | Y | Y | 75% | Low |
| Sparke et al., 2009 | N | Y | Y | Y | Y | Y | Y | Y | 75% | Low |
| Spiroski et al., 2013 | Y | Y | Y | Y | N | Y | Y | Y | 100% | Low |
| Stojanovic et al., 2013 | Y | Y | Y | Y | N | Y | Y | Y | 100% | Low |
| Sun et al., 2006 | N | Y | Y | Y | Y | Y | Y | Y | 75% | Low |
| Szakály et al., 2019 | Y | Y | Y | Y | N | Y | Y | Y | 100% | Low |
| Verbeke et al., 2009 | Y | Y | Y | Y | N | Y | Y | Y | 100% | Low |
| Verbeke, 2005 | N | Y | Y | Y | Y | Y | Y | Y | 75% | Low |
| Verneau et al., 2019 | N | Y | Y | Y | Y | Y | Y | Y | 87.50% | Low |
| Wansink et al., 2005 | Y | Y | Y | Y | N | Y | Y | Y | 100% | Low |
| Xin & Seo., 2019 | N | Y | Y | Y | Y | Y | Y | Y | 87.50% | Low |
| Yalçın et al., 2020 | N | Y | Y | Y | Y | Y | Y | Y | 87.50% | Low |

*Note.*

Q1: Is the sample surveyed representative?

Q2: Were the study sample and the setting described in detail?

Q3: Was the sample size large enough?

Q4: Was the measurement valid and reliable?

Q5: Is the survey method likely to have introduced significant bias? (e.g., sampling method could include random versus non-probability sampling).

Q6: Is there an adequate description of the data? (Including tables and summary statistics describing the sample, and adequate information on analysis results)

Q7: Were the outcomes measured in a valid and reliable way?

Q8: Are the statistical analyses appropriate?

* Recoded

Y = Yes; N = No; U = Unclear; NA = Not appliable
